# ANESTHESIOLOGY

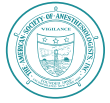

## BIG Decisions for Our Little Patients Mask vs. IV Inductions

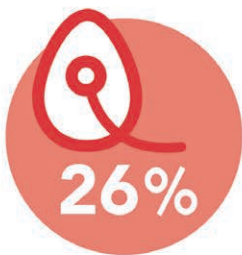

**300** children with 2 or more risk factors for respiratory events were randomized to mask or intravenous induction<sup>1</sup>:

**perioperative respiratory adverse events VS.**  
(adjusted analysis, RR 1.7; 95% CI, 1.2 to 2.3; P = 0.02)

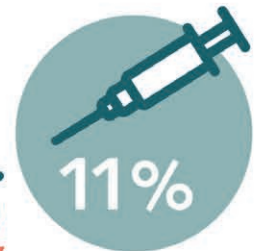

### RISK FACTORS

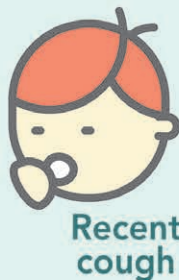

Recent cough

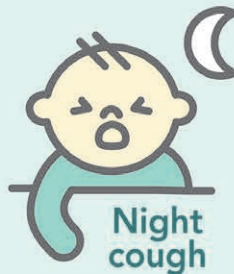

Night cough

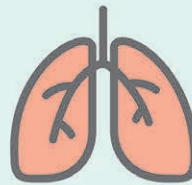

Repeated wheezing

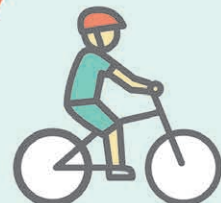

Exercise wheezing

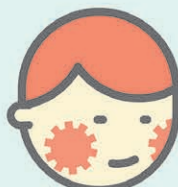

Eczema

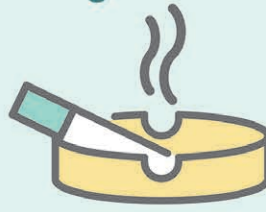

Passive smoke exposure

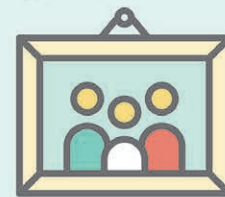

Asthma, eczema, or hay fever in family

Existing IV or

Reasonable veins  
No needle anxiety

=

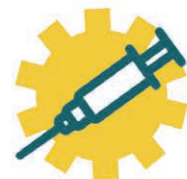

**With risk factors present, an intravenous induction may be best**

IV = intravenous; RR = relative risk.

Infographic created by Jonathan P. Wanderer, Vanderbilt University Medical Center, and James P. Rathmell, Brigham and Women's Health Care/Harvard Medical School. Illustration by Annemarie Johnson, Vivo Visuals. Address correspondence to Dr. Wanderer: jonathan.p.wanderer@vanderbilt.edu.

1. Ramgolam A, Hall GL, Zhang G, Hegarty M, von Ungern-Sternberg BS: Inhalational *versus* intravenous induction of anesthesia in children with a high risk of perioperative respiratory adverse events: A randomized controlled trial. *ANESTHESIOLOGY* 2018; 128:1065-74
